# Supplementary material
Source: Springer Nature journal article supplement (https://www.springermedizin.de/resource/supplementary/12888_2012_1199_MOESM1_ESM.pdf/9480072)

## Older Patient HAM-D Models of Responses

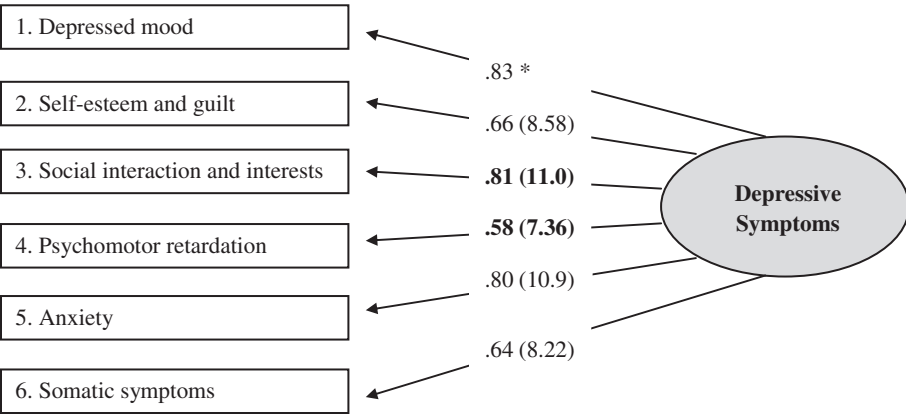

Supplement: MOESM1 [file 9480072]
